# Supplementary material for: The CU 2-D-MAX-DOAS instrument – Part 1: Retrieval of 3-D distributions of NO 2 and azimuth-dependent OVOC ratios
Source: Copernicus journal article supplement (doi:10.5194/amt-8-2371-2015), 2015-06-08
Supplement: Supplementary file 1 [file amt-8-2371-2015-supplement.pdf]

Supplement of Atmos. Meas. Tech., 8, 2371–2395, 2015  
<http://www.atmos-meas-tech.net/8/2371/2015/>  
doi:10.5194/amt-8-2371-2015-supplement  
© Author(s) 2015. CC Attribution 3.0 License.

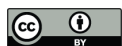

*Supplement of*

## **The CU 2-D-MAX-DOAS instrument – Part 1: Retrieval of 3-D distributions of NO<sub>2</sub> and azimuth-dependent OVOC ratios**

**I. Ortega et al.**

*Correspondence to:* R. Volkamer ([rainer.volkamer@colorado.edu](mailto:rainer.volkamer@colorado.edu))

The copyright of individual parts of the supplement might differ from the CC-BY 3.0 licence.

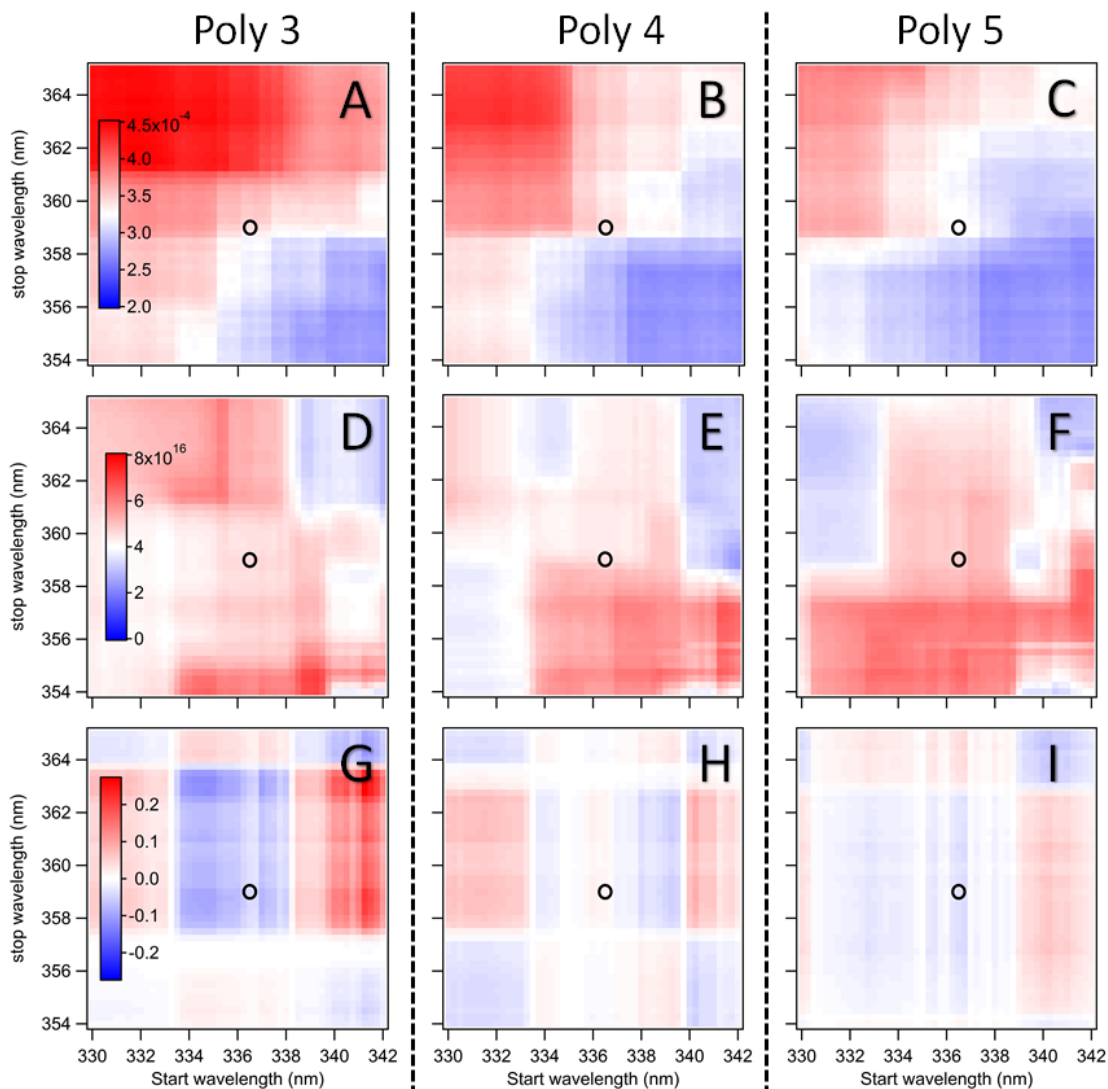

Figure S1. Sensitivity studies of the spectral window for the fit of HCHO (see figure 3 and tables 3 and 4). The top row (A-C) shows the RMS achieved using different polynomial degree (columns). Middle row shows the HCHO dSCD (D-F), and bottom row shows the degree of correlation between HCHO and BrO (G-H) - positive values correspond to some correlation and negative values anti-correlation. As can be seen the retrieval of HCHO is stable under different conditions and the retrieval window applied in this work (black open circle) with a polynomial degree of 3 shows less correlation with BrO with minimum RMS in agreement with Pinardi et al. (2013).

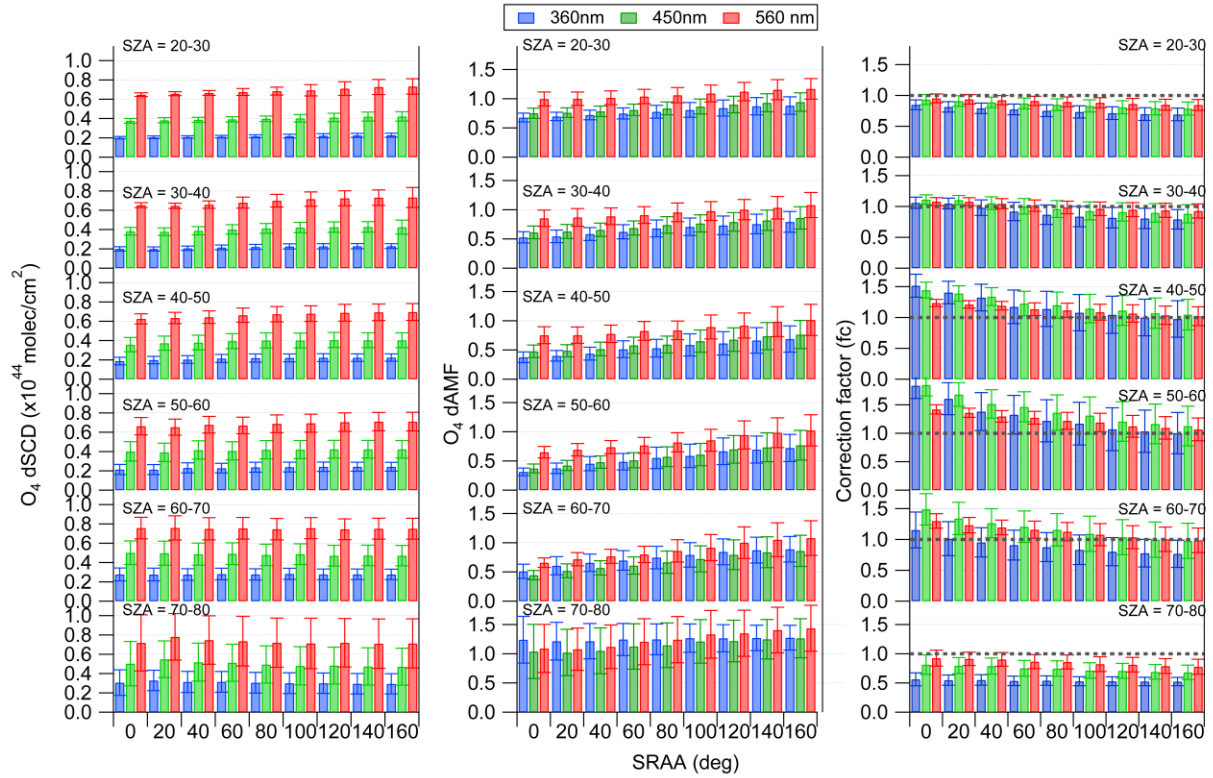

Fig S2.  $O_4$  input parameters to equations 5 and 6; and fc as a function of SRAA and SZA. The error bars in  $O_4$  dSCD reflect the variability of the measurements, and the error bars in  $O_4$  dAMF and fc reflect sensitivity studies from Table 5.

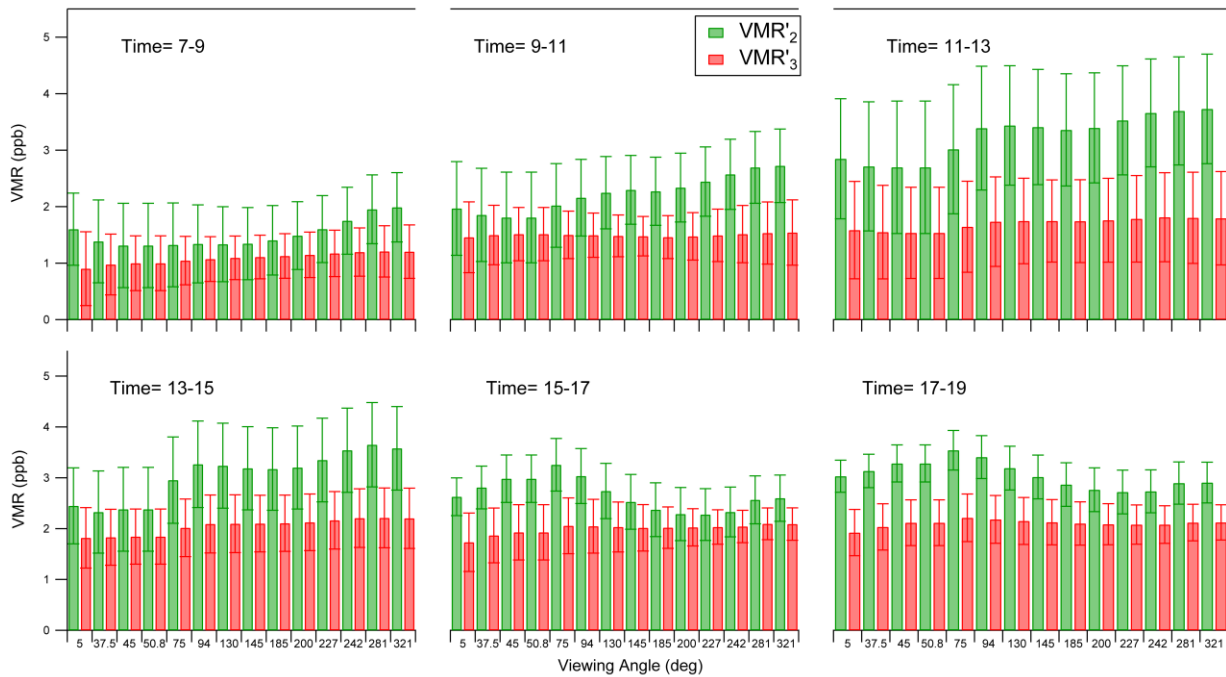

Fig S3. Azimuth and time dependence of NO<sub>2</sub> VMR<sub>2</sub> and VMR<sub>3</sub>. The data from Figure 9 is binned using data from 2hr time intervals. The error bars represent the overall uncertainty after error propagation.

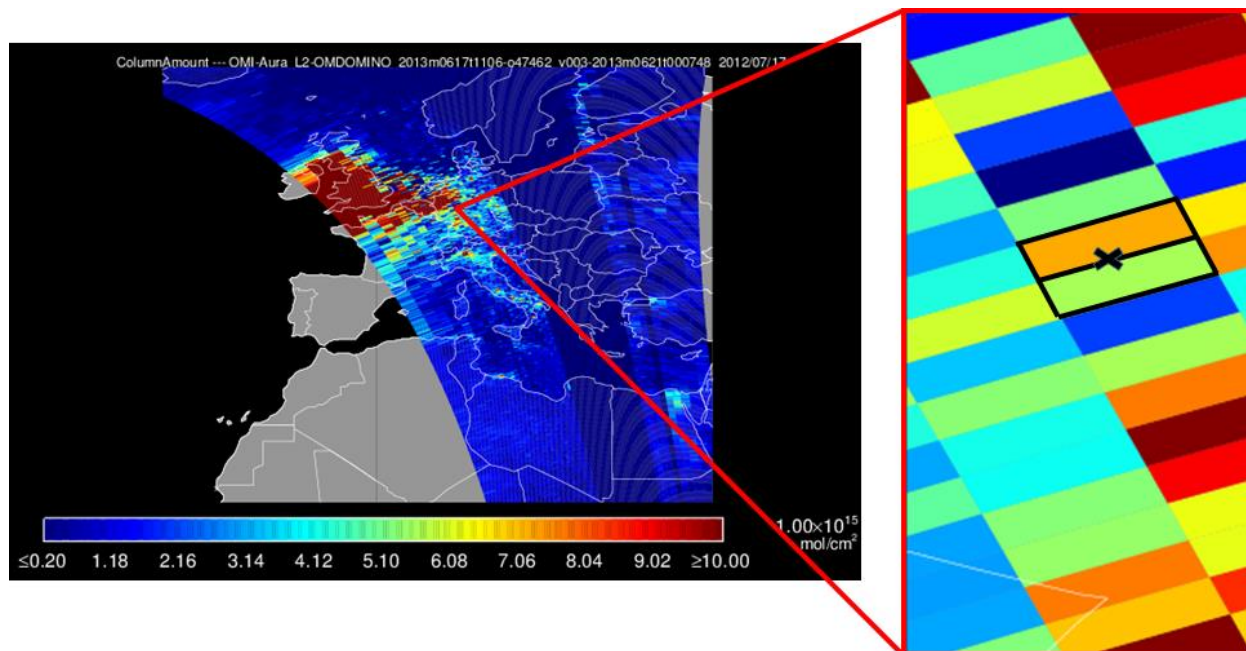

Figure S4. Tropospheric NO<sub>2</sub> VCD obtained on June 17 2013 with the OMI instrument (data derived with the DOMINO v2.0). On the right it is shown the NO<sub>2</sub> VCD pixel around Mainz (cross). The two pixels representative of the path length probed by the CU 2D-MAX-DOAS are marked. The size of the pixel is ~15x30km.

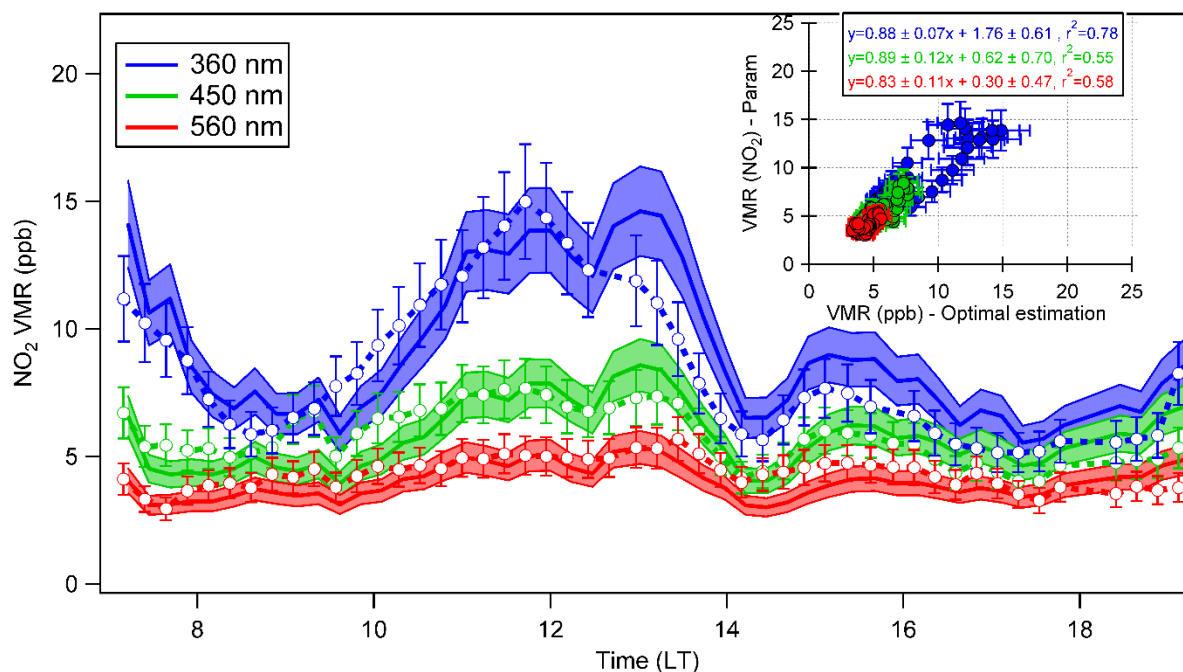

Figure S5. Multi-wavelength comparison of NO<sub>2</sub> time series using the parameterization approach (continuous lines) and optimal estimation (open circles). In order to account for the different range sensitivity we have averaged the NO<sub>2</sub> profiles from figure 6 to a similar representative height of the parameterization approach for each wavelength. In this case we have used a height of 0.2, 0.6, and 1.0 Km for the 360, 450, and 560nm. The insert shows the linear correlation for each wavelength.
